# Supplementary material for: Integrated analysis of gene expression and copy number identified potential cancer driver genes with amplification-dependent overexpression in 1,454 solid tumors
Source: PubMed Central journal article supplement (PMC5428069; doi:10.1038/s41598-017-00219-3), 2017-04-04
Supplement: 41598_2017_219_MOESM1_ESM.pdf [file 41598_2017_219_MOESM1_ESM.pdf]

## Supplementary Information

# Integrated analysis of gene expression and copy number identified potential cancer driver genes with amplification-dependent overexpression in 1,454 solid tumors

Keiichi Ohshima<sup>1\*</sup>, Keiichi Hatakeyama<sup>1</sup>, Takeshi Nagashima<sup>2,3</sup>, Yuko Watanabe<sup>1</sup>, Kaori Kanto<sup>1</sup>, Yuki Doi<sup>1</sup>, Tomomi Ide<sup>1</sup>, Yuji Shimoda<sup>2,3</sup>, Tomoe Tanabe<sup>2,3</sup>, Sumiko Ohnami<sup>2</sup>, Shumpei Ohnami<sup>2</sup>, Masakuni Serizawa<sup>4</sup>, Koji Maruyama<sup>5</sup>, Yasuto Akiyama<sup>6</sup>, Kenichi Urakami<sup>2</sup>, Masatoshi Kusuhara<sup>4,7</sup>, Tohru Mochizuki<sup>1</sup> & Ken Yamaguchi<sup>8</sup>

<sup>1</sup>Medical Genetics Division, <sup>2</sup>Cancer Diagnostics Research Division, <sup>4</sup>Drug Discovery and Development Division, <sup>5</sup>Experimental Animal Facility, <sup>6</sup>Immunotherapy Division, <sup>7</sup>Region Resources Division, Shizuoka Cancer Center Research Institute, Shizuoka 411-8777, Japan. <sup>3</sup>SRL, Inc., Tokyo 163-0409, Japan. <sup>8</sup>Shizuoka Cancer Center Hospital and Research Institute, Shizuoka 411-8777, Japan.

\*Correspondence and requests for materials should be addressed to K.O. (email: k.ohshima@scchr.jp)

**Table S1. List of 138 cancer driver genes.**

| <b>Gene symbol</b> | <b>Classification</b> | <b>Type</b>    | <b>Core pathway</b>        |
|--------------------|-----------------------|----------------|----------------------------|
| <i>ABL1</i>        | Oncogene              | Mutation-based | Cell Cycle/Apoptosis       |
| <i>AKT1</i>        | Oncogene              | Mutation-based | PI3K                       |
| <i>ALK</i>         | Oncogene              | Mutation-based | RTK*                       |
| <i>AR</i>          | Oncogene              | Mutation-based | Transcriptional Regulation |
| <i>BCL2</i>        | Oncogene              | Mutation-based | Cell Cycle/Apoptosis       |
| <i>BRAF</i>        | Oncogene              | Mutation-based | RAS                        |
| <i>CARD11</i>      | Oncogene              | Mutation-based | Cell Cycle/Apoptosis       |
| <i>CBL</i>         | Oncogene              | Mutation-based | RTK                        |
| <i>CRLF2</i>       | Oncogene              | Mutation-based | STAT                       |
| <i>CSF1R</i>       | Oncogene              | Mutation-based | RTK                        |
| <i>CTNNB1</i>      | Oncogene              | Mutation-based | APC                        |
| <i>DNMT1</i>       | Oncogene              | Mutation-based | Chromatin Modification     |
| <i>DNMT3A</i>      | Oncogene              | Mutation-based | Chromatin Modification     |
| <i>EGFR</i>        | Oncogene              | Mutation-based | RTK                        |
| <i>ERBB2</i>       | Oncogene              | Mutation-based | RTK                        |
| <i>EZH2</i>        | Oncogene              | Mutation-based | Chromatin Modification     |
| <i>FGFR2</i>       | Oncogene              | Mutation-based | RTK                        |
| <i>FGFR3</i>       | Oncogene              | Mutation-based | RTK                        |
| <i>FLT3</i>        | Oncogene              | Mutation-based | RTK                        |
| <i>FOXL2</i>       | Oncogene              | Mutation-based | TGF- $\beta$               |
| <i>GATA2</i>       | Oncogene              | Mutation-based | Transcriptional Regulation |
| <i>GNA11</i>       | Oncogene              | Mutation-based | RAS                        |
| <i>GNAQ</i>        | Oncogene              | Mutation-based | RAS                        |
| <i>GNAS</i>        | Oncogene              | Mutation-based | RAS                        |
| <i>H3F3A</i>       | Oncogene              | Mutation-based | Chromatin Modification     |
| <i>HIST1H3B</i>    | Oncogene              | Mutation-based | Chromatin Modification     |
| <i>HRAS</i>        | Oncogene              | Mutation-based | RAS                        |
| <i>IDH1</i>        | Oncogene              | Mutation-based | Chromatin Modification     |
| <i>IDH2</i>        | Oncogene              | Mutation-based | Chromatin Modification     |
| <i>JAK1</i>        | Oncogene              | Mutation-based | STAT                       |
| <i>JAK2</i>        | Oncogene              | Mutation-based | STAT                       |
| <i>JAK3</i>        | Oncogene              | Mutation-based | STAT                       |

|                |          |                     |                            |
|----------------|----------|---------------------|----------------------------|
| <i>KIT</i>     | Oncogene | Mutation-based      | RTK                        |
| <i>KLF4</i>    | Oncogene | Mutation-based      | Transcriptional Regulation |
| <i>KRAS</i>    | Oncogene | Mutation-based      | RAS                        |
| <i>MAP2K1</i>  | Oncogene | Mutation-based      | RAS                        |
| <i>MED12</i>   | Oncogene | Mutation-based      | Cell Cycle/Apoptosis       |
| <i>MET</i>     | Oncogene | Mutation-based      | RTK                        |
| <i>MPL</i>     | Oncogene | Mutation-based      | STAT                       |
| <i>MYD88</i>   | Oncogene | Mutation-based      | Cell Cycle/Apoptosis       |
| <i>NFE2L2</i>  | Oncogene | Mutation-based      | Cell Cycle/Apoptosis       |
| <i>NRAS</i>    | Oncogene | Mutation-based      | RAS                        |
| <i>PDGFRA</i>  | Oncogene | Mutation-based      | RTK                        |
| <i>PIK3CA</i>  | Oncogene | Mutation-based      | PI3K                       |
| <i>PPP2R1A</i> | Oncogene | Mutation-based      | Cell Cycle/Apoptosis       |
| <i>PTPN11</i>  | Oncogene | Mutation-based      | RAS                        |
| <i>RET</i>     | Oncogene | Mutation-based      | RTK                        |
| <i>SETBP1</i>  | Oncogene | Mutation-based      | Chromatin Modification     |
| <i>SF3B1</i>   | Oncogene | Mutation-based      | Transcriptional Regulation |
| <i>SMO</i>     | Oncogene | Mutation-based      | Hedgehog                   |
| <i>SPOP</i>    | Oncogene | Mutation-based      | Chromatin Modification     |
| <i>SRSF2</i>   | Oncogene | Mutation-based      | Transcriptional Regulation |
| <i>TSHR</i>    | Oncogene | Mutation-based      | Transcriptional Regulation |
| <i>U2AF1</i>   | Oncogene | Mutation-based      | Transcriptional Regulation |
| <i>CCND1</i>   | Oncogene | Amplification-based | Cell Cycle/Apoptosis       |
| <i>LMO1</i>    | Oncogene | Amplification-based | Transcriptional Regulation |
| <i>MDM2</i>    | Oncogene | Amplification-based | Cell Cycle/Apoptosis       |
| <i>MDM4</i>    | Oncogene | Amplification-based | Cell Cycle/Apoptosis       |
| <i>MYC</i>     | Oncogene | Amplification-based | Transcriptional Regulation |
| <i>MYCL</i>    | Oncogene | Amplification-based | Transcriptional Regulation |
| <i>MYCN</i>    | Oncogene | Amplification-based | Transcriptional Regulation |
| <i>NCOA3</i>   | Oncogene | Amplification-based | Chromatin Modification     |
| <i>NKX2-1</i>  | Oncogene | Amplification-based | Transcriptional Regulation |
| <i>SKP2</i>    | Oncogene | Amplification-based | Cell Cycle/Apoptosis       |
| <i>ACVR1B</i>  | TSG      | Mutation-based      | TGF- $\beta$               |
| <i>AMER1</i>   | TSG      | Mutation-based      | APC                        |
| <i>APC</i>     | TSG      | Mutation-based      | APC                        |

|               |     |                |                            |
|---------------|-----|----------------|----------------------------|
| <i>ARID1A</i> | TSG | Mutation-based | Chromatin Modification     |
| <i>ARID1B</i> | TSG | Mutation-based | Chromatin Modification     |
| <i>ARID2</i>  | TSG | Mutation-based | Chromatin Modification     |
| <i>ASXL1</i>  | TSG | Mutation-based | Chromatin Modification     |
| <i>ATM</i>    | TSG | Mutation-based | DNA Damage Control         |
| <i>ATRX</i>   | TSG | Mutation-based | Chromatin Modification     |
| <i>AXIN1</i>  | TSG | Mutation-based | APC                        |
| <i>B2M</i>    | TSG | Mutation-based | RAS                        |
| <i>BAP1</i>   | TSG | Mutation-based | DNA Damage Control         |
| <i>BCOR</i>   | TSG | Mutation-based | Transcriptional Regulation |
| <i>BRCA1</i>  | TSG | Mutation-based | DNA Damage Control         |
| <i>BRCA2</i>  | TSG | Mutation-based | DNA Damage Control         |
| <i>CASP8</i>  | TSG | Mutation-based | Cell Cycle/Apoptosis       |
| <i>CDC73</i>  | TSG | Mutation-based | Cell Cycle/Apoptosis       |
| <i>CDH1</i>   | TSG | Mutation-based | APC                        |
| <i>CDKN2A</i> | TSG | Mutation-based | Cell Cycle/Apoptosis       |
| <i>CEBPA</i>  | TSG | Mutation-based | Transcriptional Regulation |
| <i>CIC</i>    | TSG | Mutation-based | RAS                        |
| <i>CREBBP</i> | TSG | Mutation-based | Chromatin Modification     |
| <i>CYLD</i>   | TSG | Mutation-based | Cell Cycle/Apoptosis       |
| <i>DAXX</i>   | TSG | Mutation-based | Chromatin Modification     |
| <i>EP300</i>  | TSG | Mutation-based | Chromatin Modification     |
| <i>FBXW7</i>  | TSG | Mutation-based | NOTCH                      |
| <i>FUBP1</i>  | TSG | Mutation-based | Cell Cycle/Apoptosis       |
| <i>GATA1</i>  | TSG | Mutation-based | Transcriptional Regulation |
| <i>GATA3</i>  | TSG | Mutation-based | Transcriptional Regulation |
| <i>HNF1A</i>  | TSG | Mutation-based | APC                        |
| <i>KDM5C</i>  | TSG | Mutation-based | Chromatin Modification     |
| <i>KDM6A</i>  | TSG | Mutation-based | Chromatin Modification     |
| <i>KMT2C</i>  | TSG | Mutation-based | Chromatin Modification     |
| <i>KMT2D</i>  | TSG | Mutation-based | Chromatin Modification     |
| <i>MAP3K1</i> | TSG | Mutation-based | RAS                        |
| <i>MEN1</i>   | TSG | Mutation-based | Chromatin Modification     |
| <i>MLH1</i>   | TSG | Mutation-based | DNA Damage Control         |
| <i>MSH2</i>   | TSG | Mutation-based | DNA Damage Control         |

|                |     |                |                            |
|----------------|-----|----------------|----------------------------|
| <i>MSH6</i>    | TSG | Mutation-based | DNA Damage Control         |
| <i>NCOR1</i>   | TSG | Mutation-based | Chromatin Modification     |
| <i>NF1</i>     | TSG | Mutation-based | RAS                        |
| <i>NF2</i>     | TSG | Mutation-based | APC                        |
| <i>NOTCH1</i>  | TSG | Mutation-based | NOTCH                      |
| <i>NOTCH2</i>  | TSG | Mutation-based | NOTCH                      |
| <i>NPM1</i>    | TSG | Mutation-based | Cell Cycle/Apoptosis       |
| <i>PAX5</i>    | TSG | Mutation-based | Chromatin Modification     |
| <i>PBRM1</i>   | TSG | Mutation-based | Chromatin Modification     |
| <i>PHF6</i>    | TSG | Mutation-based | Transcriptional Regulation |
| <i>PIK3R1</i>  | TSG | Mutation-based | PI3K                       |
| <i>PRDM1</i>   | TSG | Mutation-based | Chromatin Modification     |
| <i>PTCH1</i>   | TSG | Mutation-based | Hedgehog                   |
| <i>PTEN</i>    | TSG | Mutation-based | PI3K                       |
| <i>RB1</i>     | TSG | Mutation-based | Cell Cycle/Apoptosis       |
| <i>RNF43</i>   | TSG | Mutation-based | APC                        |
| <i>RUNX1</i>   | TSG | Mutation-based | Transcriptional Regulation |
| <i>SETD2</i>   | TSG | Mutation-based | Chromatin Modification     |
| <i>SMAD2</i>   | TSG | Mutation-based | TGF- $\beta$               |
| <i>SMAD4</i>   | TSG | Mutation-based | TGF- $\beta$               |
| <i>SMARCA4</i> | TSG | Mutation-based | Chromatin Modification     |
| <i>SMARCB1</i> | TSG | Mutation-based | Chromatin Modification     |
| <i>SOCS1</i>   | TSG | Mutation-based | STAT                       |
| <i>SOX9</i>    | TSG | Mutation-based | APC                        |
| <i>STAG2</i>   | TSG | Mutation-based | DNA Damage Control         |
| <i>STK11</i>   | TSG | Mutation-based | PI3K                       |
| <i>TET2</i>    | TSG | Mutation-based | Chromatin Modification     |
| <i>TNFAIP3</i> | TSG | Mutation-based | Cell Cycle/Apoptosis       |
| <i>TP53</i>    | TSG | Mutation-based | Cell Cycle/Apoptosis       |
| <i>TRAF7</i>   | TSG | Mutation-based | Cell Cycle/Apoptosis       |
| <i>TSC1</i>    | TSG | Mutation-based | PI3K                       |
| <i>VHL</i>     | TSG | Mutation-based | PI3K                       |
| <i>WT1</i>     | TSG | Mutation-based | Chromatin Modification     |
| <i>CDKN2C</i>  | TSG | Deletion-based | Cell Cycle/Apoptosis       |
| <i>IKZF1</i>   | TSG | Deletion-based | Transcriptional Regulation |

---

|               |     |                |     |
|---------------|-----|----------------|-----|
| <i>MAP2K4</i> | TSG | Deletion-based | RAS |
|---------------|-----|----------------|-----|

---

\*RTK: receptor tyrosine kinase

**Table S2. Panel of 820 cancer-related genes (SCC-820).**

|          |        |         |          |          |         |        |         |         |        |
|----------|--------|---------|----------|----------|---------|--------|---------|---------|--------|
| ABCB1    | ABCC2  | ABCC4   | ABCG2    | ABL1     | ABL2    | ACO1   | ACVR1B  | ACVR2A  | ACVR2B |
| ADAMTS20 | ADGRA2 | ADGRB3  | ADGRL3   | ADNP     | AFF1    | AFF3   | AJUBA   | AKAP9   | AKT1   |
| AKT2     | AKT3   | ALK     | ALKBH6   | ALOX12B  | ALPK2   | AMER1  | APC     | APCDD1  | APOL2  |
| AR       | ARAF   | ARFRP1  | ARHGAP35 | ARID1A   | ARID1B  | ARID2  | ARID5B  | ARL11   | ARNT   |
| ASXL1    | ASXL2  | ASXL3   | ATF1     | ATM      | ATP1A1  | ATP5B  | ATR     | ATRX    | AURKA  |
| AURKB    | AURKC  | AXIN1   | AXIN2    | AXL      | AZGP1   | B2M    | B4GALT3 | BACH1   | BAK1   |
| BAP1     | BARD1  | BBC3    | BCL10    | BCL11A   | BCL11B  | BCL2   | BCL2L1  | BCL2L11 | BCL2L2 |
| BCL3     | BCL6   | BCL9    | BCLAF1   | BCOR     | BCORL1  | BCR    | BIRC2   | BIRC3   | BIRC5  |
| BLM      | BLNK   | BMPR1A  | BRAF     | BRCA1    | BRCA2   | BRD3   | BRD4    | BRE     | BRIP1  |
| BRWD3    | BTG1   | BTK     | BUB1B    | C11orf30 | CACNA1D | CALR   | CAP2    | CARD11  | CASC5  |
| CASP8    | CBFB   | CBL     | CBLB     | CBLC     | CCND1   | CCND2  | CCND3   | CCNE1   | CD1D   |
| CD274    | CD276  | CD70    | CD79A    | CD79B    | CDC27   | CDC73  | CDH1    | CDH11   | CDH12  |
| CDH18    | CDH2   | CDH20   | CDH5     | CDK12    | CDK4    | CDK6   | CDK8    | CDKN1A  | CDKN1B |
| CDKN2A   | CDKN2B | CDKN2C  | CEBPA    | CENPL    | CEP76   | CERS2  | CHD4    | CHD8    | CHEK1  |
| CHEK2    | CHUK   | CIC     | CKS1B    | CMPK1    | CNBD1   | CNKSR1 | CNOT3   | COL1A1  | COMT   |
| CRBN     | CREB1  | CREBBP  | CRIPAK   | CRKL     | CRLF2   | CRTC1  | CSF1R   | CSF3R   | CSMD3  |
| CTCF     | CTLA4  | CTNNA1  | CTNNB1   | CTTN     | CUL3    | CUL4A  | CUL4B   | CUX1    | CYLD   |
| CYP17A1  | CYP1B1 | CYP2C19 | CYP2C8   | CYP2D6   | CYP3A4  | CYP3A5 | DAXX    | DCAF6   | DCC    |
| DCUN1D1  | DDB1   | DDB2    | DDIT3    | DDR1     | DDR2    | DDX11  | DDX3X   | DDX5    | DEK    |
| DIAPH1   | DICER1 | DIDO1   | DIS3     | DLC1     | DNER    | DNM2   | DNMT1   | DNMT3A  | DNMT3B |
| DOT1L    | DPYD   | DST     | E2F3     | ECSCR    | ECT2L   | EED    | EGFL7   | EGFR    | EGR3   |

|        |         |         |        |        |          |          |           |          |          |
|--------|---------|---------|--------|--------|----------|----------|-----------|----------|----------|
| EIF1AX | EIF2S2  | EIF3A   | EIF4A2 | ELF3   | EME2     | EML4     | EP300     | EP400    | EPCAM    |
| EPHA2  | EPHA3   | EPHA5   | EPHA7  | EPHB1  | EPHB2    | EPHB4    | EPHB6     | EPPK1    | ERBB2    |
| ERBB3  | ERBB4   | ERCC1   | ERCC2  | ERCC3  | ERCC4    | ERCC5    | ERG       | ESR1     | ESR2     |
| ETS1   | ETV1    | ETV4    | ETV5   | ETV6   | EWSR1    | EXT1     | EXT2      | EZH1     | EZH2     |
| EZR    | FAM129B | FAM175A | FAM46C | FANCA  | FANCB    | FANCC    | FANCD2    | FANCE    | FANCF    |
| FANCG  | FANCI   | FANCL   | FANCM  | FAS    | FAT1     | FAT3     | FBXO11    | FBXW7    | FCGR1A   |
| FCGR2A | FCGR3A  | FGF10   | FGF12  | FGF14  | FGF19    | FGF23    | FGF3      | FGF4     | FGF6     |
| FGF7   | FGFBP1  | FGFR1   | FGFR2  | FGFR3  | FGFR4    | FH       | FHIT      | FKBP9    | FLCN     |
| FLI1   | FLT1    | FLT3    | FLT4   | FN1    | FOXA1    | FOXA2    | FOXL2     | FOXO1    | FOXO3    |
| FOXP1  | FOXP4   | FOXQ1   | FUBP1  | FZD1   | FZR1     | G6PD     | GAB2      | GATA1    | GATA2    |
| GATA3  | GDNF    | GID4    | GNA11  | GNA13  | GNAQ     | GNAS     | GNB1      | GPC3     | GPS2     |
| GREM1  | GRIN2A  | GRM3    | GRM8   | GSK3B  | GSTP1    | GUCY1A2  | H3F3A     | H3F3B    | H3F3C    |
| HAUS3  | HCAR1   | HDAC4   | HGF    | HIF1A  | HIST1H1C | HIST1H1E | HIST1H2BD | HIST1H3B | HIST1H4E |
| HLA-A  | HLA-B   | HLA-G   | HLF    | HNF1A  | HOOK3    | HRAS     | HSP90AA1  | HSP90AB1 | ICK      |
| ICOSLG | IDH1    | IDH2    | IFITM1 | IFITM3 | IFNGR1   | IGF1     | IGF1R     | IGF2     | IGF2R    |
| IKBKB  | IKBKE   | IKZF1   | IL10   | IL2    | IL21R    | IL6ST    | IL7R      | ING1     | ING4     |
| INHA   | INHBA   | INPP4A  | INPP4B | INPPL1 | INSR     | IPO7     | IRF4      | IRS1     | IRS2     |
| ITGA10 | ITGA9   | ITGAV   | ITGB2  | ITGB3  | ITPA     | JAK1     | JAK2      | JAK3     | JUN      |
| KAT6A  | KAT6B   | KCNJ5   | KDM5A  | KDM5C  | KDM6A    | KDR      | KEAP1     | KIF5B    | KIT      |
| KLF4   | KLF6    | KLHL6   | KMT2A  | KMT2B  | KMT2C    | KMT2D    | KNSTRN    | KRAS     | LAMP1    |
| LATS1  | LATS2   | LCK     | LIFR   | LMO1   | LPP      | LRP1B    | LRP2      | LRRK2    | LTF      |
| LTK    | MAF     | MAFB    | MAGEA1 | MAGI1  | MAGOH    | MALAT1   | MALT1     | MAML2    | MAN1B1   |



|        |          |         |         |         |         |         |        |         |         |
|--------|----------|---------|---------|---------|---------|---------|--------|---------|---------|
| MAP2K1 | MAP2K2   | MAP2K4  | MAP3K1  | MAP3K13 | MAP3K15 | MAP3K7  | MAP4K1 | MAP4K3  | MAPK1   |
| MAPK8  | MAPK8IP1 | MARK1   | MARK4   | MAX     | MBD1    | MC1R    | MCL1   | MDC1    | MDM2    |
| MDM4   | MECOM    | MED12   | MED23   | MEF2A   | MEF2B   | MEN1    | MET    | MGA     | MIR142  |
| MITF   | MLH1     | MLLT10  | MMP2    | MN1     | MNDA    | MORC4   | MPL    | MRE11A  | MSH2    |
| MSH6   | MTHFR    | MTOR    | MTR     | MTRR    | MTUS2   | MUC1    | MUTYH  | MXRA5   | MYB     |
| MYC    | MYCL     | MYCN    | MYD88   | MYH11   | MYH9    | MYLK    | MYOD1  | NAV3    | NBN     |
| NBPF1  | NCOA1    | NCOA2   | NCOA3   | NCOA4   | NCOR1   | NEIL1   | NF1    | NF2     | NFE2L2  |
| NFKB1  | NFKB2    | NFKBIA  | NIN     | NKX2-1  | NKX3-1  | NLRP1   | NOTCH1 | NOTCH2  | NOTCH3  |
| NOTCH4 | NPM1     | NQO1    | NRAS    | NRP2    | NSD1    | NT5C2   | NTN4   | NTRK1   | NTRK2   |
| NTRK3  | NUMA1    | NUP214  | NUP93   | NUP98   | NUTM1   | ODAM    | OTUD7A | PAK1    | PAK3    |
| PAK7   | PALB2    | PAPD5   | PARK2   | PARP1   | PARP2   | PARP3   | PARP4  | PAX3    | PAX5    |
| PAX7   | PAX8     | PBRM1   | PBX1    | PCBP1   | PCDH10  | PDAP1   | PDCD1  | PDCD2L  | PDE4DIP |
| PDGFB  | PDGFRA   | PDGFRB  | PDK1    | PDPK1   | PDSS2   | PER1    | PGAP3  | PGR     | PHF6    |
| PHOX2B | PIK3C2B  | PIK3C2G | PIK3C3  | PIK3CA  | PIK3CB  | PIK3CD  | PIK3CG | PIK3R1  | PIK3R2  |
| PIK3R3 | PIM1     | PKHD1   | PLAG1   | PLCG1   | PLCG2   | PLEKHG5 | PLK2   | PMAIP1  | PML     |
| PMS1   | PMS2     | PNRC1   | POLD1   | POLE    | POLQ    | PORCN   | POT1   | POU2AF1 | POU2F2  |
| POU5F1 | PPARG    | PPM1D   | PPP2R1A | PPP6C   | PRDM1   | PRKAR1A | PRKDC  | PRLR    | PRPF40B |
| PRSS8  | PSIP1    | PTCH1   | PTEN    | PTGS2   | PTK2B   | PTPN11  | PTPRB  | PTPRC   | PTPRD   |
| PTPRS  | PTPRT    | QKI     | RAB40A  | RAC1    | RAD1    | RAD21   | RAD50  | RAD51   | RAD51B  |
| RAD51C | RAD51D   | RAD52   | RAD54L  | RAF1    | RALGDS  | RALY    | RARA   | RASA1   | RB1     |
| RBM10  | RBMX     | RECQL4  | REL     | RET     | RFWD2   | RHBDF2  | RHEB   | RHOA    | RHOH    |
| RICTOR | RIT1     | RNASEL  | RNF2    | RNF213  | RNF43   | ROS1    | RPA1   | RPL10   | RPL22   |

|         |         |           |         |          |         |         |         |         |        |
|---------|---------|-----------|---------|----------|---------|---------|---------|---------|--------|
| RPL5    | RPS14   | RPS15     | RPS2    | RPS6KA2  | RPS6KA4 | RPS6KB2 | RPTOR   | RRM1    | RUNX1  |
| RUNX1T1 | RUNX3   | RXRA      | RYBP    | SAMD9    | SBDS    | SDHA    | SDHAF2  | SDHB    | SDHC   |
| SDHD    | SEPT9   | SERPINB13 | SETBP1  | SETD2    | SETDB1  | SF1     | SF3B1   | SGK1    | SH2B3  |
| SH2D1A  | SHQ1    | SIN3A     | SIRPA   | SIRT4    | SKP2    | SLC19A1 | SLC22A2 | SLCO1B3 | SMAD2  |
| SMAD3   | SMAD4   | SMARCA4   | SMARCB1 | SMARCD1  | SMARCE1 | SMC1A   | SMC3    | SMO     | SMUG1  |
| SNX25   | SOCS1   | SOD2      | SOS1    | SOX10    | SOX11   | SOX17   | SOX2    | SOX9    | SPEN   |
| SPOP    | SPRY4   | SRC       | SRSF2   | SSX1     | STAG2   | STAT3   | STAT4   | STAT5B  | STK11  |
| STK19   | STK36   | STK38     | STK40   | STX2     | SUFU    | SULT1A1 | SUZ12   | SYK     | SYNE1  |
| SZRD1   | TAF1    | TAF1L     | TAL1    | TBC1D12  | TBL1XR1 | TBX22   | TBX3    | TCEB1   | TCF12  |
| TCF3    | TCF4    | TCF7L1    | TCF7L2  | TCL1A    | TERT    | TET1    | TET2    | TFE3    | TFG    |
| TGFBR1  | TGFBR2  | TGM7      | THBS1   | TIMM17A  | TIMP3   | TIPARP  | TLK2    | TLR4    | TLX1   |
| TMEM127 | TMPRSS2 | TNF       | TNFAIP3 | TNFRSF14 | TNK2    | TOP1    | TP53    | TP53BP1 | TP63   |
| TPMT    | TPR     | TPX2      | TRAF3   | TRAF7    | TRIM24  | TRIM33  | TRIP11  | TRRAP   | TSC1   |
| TSC2    | TSHR    | TSHZ2     | TSHZ3   | TYMS     | TYR     | U2AF1   | U2AF2   | UBR5    | UGT1A1 |
| UMPS    | USP9X   | VANGL2    | VEZF1   | VHL      | VTCN1   | WAC     | WAS     | WASF3   | WHSC1  |
| WISP3   | WNK1    | WRN       | WT1     | XIAP     | XPA     | XPC     | XPO1    | XRCC2   | XRCC3  |
| YAP1    | YES1    | ZFHX3     | ZNF217  | ZNF384   | ZNF521  | ZNF668  | ZNF703  | ZRANB3  | ZRSR2  |

Cross-referencing with microarray probe information, 814 genes were detectable among the SCC-820 gene data set, and a total of 879 probes were selected, since some genes had multiple probes recognizing splice variants. The six genes whose probes were not present in the microarray were *MIR142*, *NBPF1*, *RAB40A*, *SULT1A1*, *UGT1A1*, and *PRPF40B*.

**Table S3. Relationship between cancer stage and highly recurrent oncogenes amplified with overexpression in specific tumors.**

| Gene            | Tumor type | Number of amplification/overexpression samples |                |             |                | Fisher's exact test<br><i>P</i> -value |
|-----------------|------------|------------------------------------------------|----------------|-------------|----------------|----------------------------------------|
|                 |            | Positive                                       |                | Negative    |                |                                        |
|                 |            | Stage I, II                                    | Stage III, IIV | Stage I, II | Stage III, IIV |                                        |
| <i>MYC</i>      | Colorectal | 45                                             | 77             | 122         | 248            | 0.4417                                 |
| <i>MYCN</i>     | Colorectal | 1                                              | 11             | 166         | 314            | 0.0672                                 |
|                 | Liver      | 8                                              | 1              | 50          | 28             | 0.2615                                 |
| <i>MET</i>      | Colorectal | 33                                             | 57             | 134         | 268            | 0.5408                                 |
| <i>HIST1H3B</i> | Colorectal | 4                                              | 17             | 163         | 308            | 0.1637                                 |
|                 | Lung       | 21                                             | 4              | 232         | 20             | 0.2502                                 |
|                 | Liver      | 10                                             | 6              | 48          | 23             | 0.7717                                 |
|                 | Breast     | 7                                              | 1              | 52          | 8              | 1.0000                                 |
| <i>EZH2</i>     | Colorectal | 9                                              | 23             | 158         | 302            | 0.5648                                 |
|                 | Lung       | 16                                             | 2              | 237         | 22             | 0.6609                                 |
|                 | Liver      | 5                                              | 2              | 53          | 27             | 1.0000                                 |
|                 | Breast     | 4                                              | 1              | 55          | 8              | 0.5197                                 |

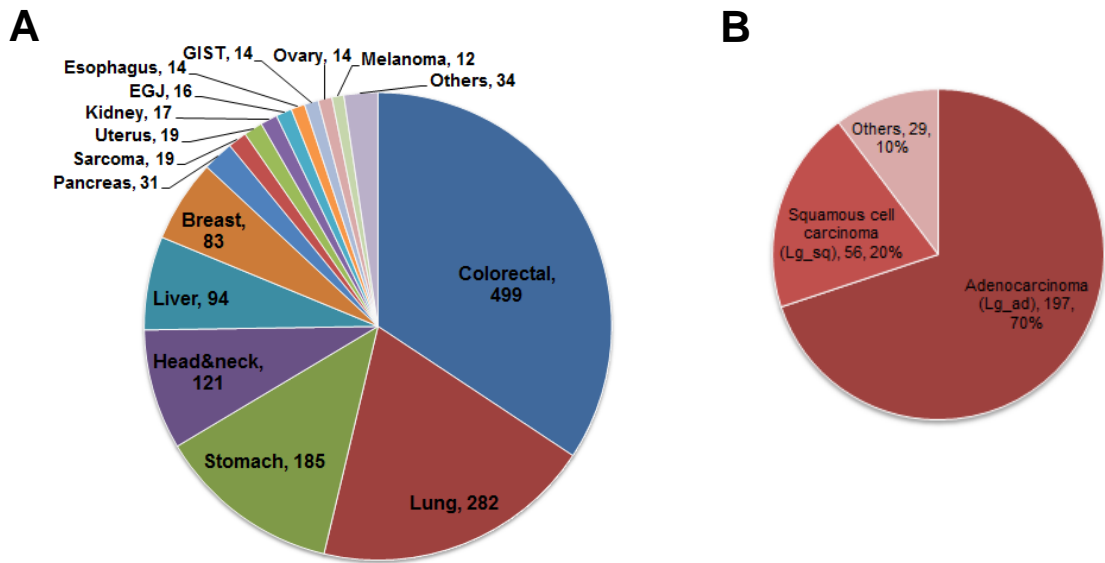

**Figure S1. Classification of 1,454 tumor samples. (A)** All samples classified by tumor type. **(B)** Lung cancer samples classified by tumor subtype including adenocarcinoma, squamous cell carcinoma, and others.

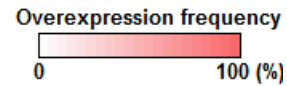

| FC ≥ 10    |      |         |           |       |        |          |         |        |        |     |           |      |       |          | 5 ≤ FC < 10  |      |         |           |       |        |          |         |        |        |     |           |      |       |          |    |    |   |
|------------|------|---------|-----------|-------|--------|----------|---------|--------|--------|-----|-----------|------|-------|----------|--------------|------|---------|-----------|-------|--------|----------|---------|--------|--------|-----|-----------|------|-------|----------|----|----|---|
| Colorectal | Lung | Stomach | Head&neck | Liver | Breast | Pancreas | Sarcoma | Uterus | Kidney | EGJ | Esophagus | GIST | Ovary | Melanoma | Colorectal   | Lung | Stomach | Head&neck | Liver | Breast | Pancreas | Sarcoma | Uterus | Kidney | EGJ | Esophagus | GIST | Ovary | Melanoma |    |    |   |
| 4          | 11   | 3       | 2         | 30    | 12     | 10       | 0       | 26     | 6      | 13  | 0         | 7    | 29    | 8        | MYCN         | 11   | 8       | 4         | 4     | 14     | 8        | 16      | 16     | 32     | 0   | 0         | 14   | 17    |          |    |    |   |
| 8          | 0    | 1       | 0         | 3     | 1      | 0        | 0       | 24     | 0      | 0   | 0         | 0    | 0     | 0        | MYC          | 29   | 6       | 3         | 2     | 1      | 0        | 0       | 11     | 0      | 24  | 6         | 0    | 0     | 0        |    |    |   |
| 5          | 7    | 1       | 6         | 3     | 18     | 6        | 0       | 32     | 18     | 6   | 0         | 0    | 21    | 0        | MYCL v.1/2   | 11   | 6       | 2         | 7     | 6      | 22       | 10      | 5      | 26     | 0   | 0         | 7    | 0     | 0        |    |    |   |
| 11         | 1    | 8       | 10        | 0     | 1      | 3        | 0       | 11     | 0      | 13  | 36        | 7    | 0     | 0        | NKX2-1       | 2    | 1       | 2         | 7     | 0      | 2        | 0       | 0      | 0      | 0   | 6         | 7    | 0     | 0        | 8  |    |   |
| 0          | 6    | 6       | 5         | 1     | 4      | 19       | 11      | 5      | 0      | 0   | 14        | 0    | 7     | 0        | LMO1         | 0    | 9       | 4         | 2     | 2      | 7        | 0       | 0      | 0      | 12  | 0         | 14   | 0     | 7        | 0  |    |   |
| 0          | 1    | 1       | 2         | 0     | 0      | 0        | 0       | 0      | 0      | 6   | 0         | 0    | 0     | 0        | SKP2         | 0    | 8       | 6         | 10    | 2      | 0        | 3       | 11     | 0      | 0   | 25        | 7    | 0     | 0        | 0  |    |   |
| 0          | 0    | 1       | 1         | 0     | 0      | 0        | 3       | 42     | 0      | 0   | 0         | 7    | 0     | 0        | CCND1        | 2    | 0       | 1         | 2     | 1      | 4        | 3       | 11     | 0      | 18  | 0         | 7    | 7     | 7        | 0  |    |   |
| 0          | 1    | 1       | 0         | 0     | 1      | 0        | 11      | 0      | 0      | 0   | 0         | 0    | 7     | 0        | MDM2         | 0    | 2       | 2         | 1     | 0      | 2        | 0       | 5      | 0      | 0   | 0         | 0    | 0     | 0        | 14 | 17 |   |
| 0          | 0    | 0       | 0         | 0     | 0      | 0        | 0       | 0      | 0      | 0   | 0         | 0    | 0     | 0        | NCOA3        | 0    | 0       | 0         | 1     | 2      | 0        | 0       | 0      | 0      | 0   | 0         | 0    | 0     | 0        | 7  | 0  |   |
| 0          | 0    | 0       | 0         | 0     | 0      | 0        | 0       | 0      | 0      | 0   | 0         | 0    | 0     | 0        | MYCL v.3     | 0    | 0       | 0         | 0     | 1      | 0        | 0       | 0      | 0      | 0   | 0         | 0    | 0     | 0        | 0  | 0  |   |
| 0          | 0    | 0       | 0         | 0     | 0      | 0        | 0       | 0      | 0      | 0   | 0         | 0    | 0     | 0        | MDM4         | 0    | 0       | 0         | 0     | 0      | 0        | 0       | 0      | 0      | 0   | 0         | 0    | 0     | 0        | 0  | 0  |   |
| 16         | 18   | 5       | 17        | 24    | 25     | 3        | 79      | 42     | 6      | 19  | 14        | 0    | 0     | 8        | HIST1H3B     | 7    | 19      | 20        | 9     | 27     | 33       | 16      | 5      | 26     | 29  | 31        | 21   | 7     | 36       | 17 |    |   |
| 17         | 8    | 2       | 7         | 4     | 11     | 0        | 26      | 26     | 0      | 6   | 0         | 0    | 14    | 0        | EZH2         | 6    | 17      | 11        | 12    | 17     | 39       | 3       | 21     | 47     | 24  | 19        | 14   | 7     | 7        | 8  |    |   |
| 13         | 3    | 4       | 13        | 0     | 24     | 19       | 16      | 11     | 6      | 6   | 21        | 0    | 36    | 8        | FGFR3        | 5    | 10      | 4         | 3     | 1      | 11       | 10      | 11     | 21     | 0   | 13        | 0    | 0     | 7        | 0  |    |   |
| 7          | 2    | 6       | 0         | 0     | 0      | 3        | 0       | 0      | 0      | 0   | 7         | 0    | 21    | 25       | MEI          | 16   | 4       | 1         | 20    | 0      | 0        | 0       | 0      | 16     | 12  | 6         | 14   | 0     | 14       | 8  |    |   |
| 5          | 1    | 1       | 2         | 2     | 1      | 0        | 5       | 5      | 6      | 13  | 7         | 7    | 7     | 0        | CARD11       | 13   | 7       | 5         | 17    | 2      | 10       | 10      | 0      | 5      | 6   | 13        | 7    | 0     | 0        | 17 |    |   |
| 1          | 11   | 9       | 30        | 0     | 4      | 0        | 26      | 11     | 0      | 13  | 36        | 14   | 21    | 17       | FOXL2        | 1    | 4       | 2         | 13    | 0      | 1        | 3       | 0      | 5      | 0   | 6         | 14   | 0     | 14       | 0  |    |   |
| 1          | 0    | 0       | 17        | 1     | 1      | 6        | 42      | 5      | 24     | 0   | 0         | 0    | 36    | 0        | JAK3         | 7    | 1       | 4         | 17    | 4      | 5        | 3       | 26     | 5      | 18  | 13        | 0    | 21    | 21       | 25 |    |   |
| 0          | 5    | 3       | 7         | 4     | 23     | 0        | 0       | 0      | 0      | 0   | 14        | 0    | 0     | 0        | RET v.2      | 0    | 4       | 4         | 12    | 1      | 14       | 3       | 5      | 0      | 6   | 0         | 7    | 0     | 0        | 0  |    |   |
| 0          | 1    | 1       | 8         | 2     | 22     | 0        | 5       | 5      | 0      | 0   | 7         | 0    | 0     | 0        | FLT3         | 2    | 0       | 3         | 12    | 3      | 22       | 3       | 11     | 5      | 18  | 6         | 0    | 0     | 0        | 0  |    |   |
| 0          | 2    | 4       | 7         | 1     | 8      | 10       | 16      | 0      | 0      | 0   | 7         | 0    | 7     | 0        | FGFR2        | 0    | 3       | 2         | 2     | 1      | 12       | 10      | 11     | 16     | 0   | 6         | 7    | 0     | 21       | 0  |    |   |
| 0          | 7    | 1       | 2         | 1     | 1      | 0        | 16      | 0      | 0      | 0   | 0         | 0    | 7     | 42       | ALK          | 0    | 6       | 1         | 2     | 1      | 1        | 6       | 5      | 5      | 0   | 0         | 7    | 0     | 14       | 8  |    |   |
| 1          | 3    | 1       | 4         | 1     | 1      | 0        | 0       | 0      | 0      | 0   | 0         | 0    | 0     | 0        | EGFR v.3     | 3    | 6       | 1         | 7     | 0      | 0        | 10      | 0      | 0      | 0   | 0         | 29   | 0     | 0        | 0  |    |   |
| 1          | 1    | 3       | 2         | 0     | 17     | 0        | 5       | 0      | 13     | 0   | 0         | 0    | 0     | 0        | ERBB2        | 1    | 2       | 1         | 0     | 1      | 17       | 10      | 0      | 0      | 0   | 6         | 0    | 0     | 7        | 0  |    |   |
| 0          | 1    | 0       | 1         | 0     | 2      | 0        | 21      | 0      | 0      | 0   | 0         | 0    | 7     | 0        | IDH2         | 0    | 10      | 0         | 1     | 0      | 10       | 0       | 0      | 21     | 0   | 0         | 0    | 0     | 14       | 0  |    |   |
| 0          | 0    | 1       | 2         | 6     | 5      | 3        | 5       | 0      | 12     | 0   | 0         | 0    | 0     | 17       | KIT          | 0    | 1       | 1         | 2     | 5      | 4        | 6       | 21     | 0      | 0   | 0         | 0    | 0     | 0        | 17 |    |   |
| 0          | 3    | 1       | 6         | 0     | 1      | 0        | 0       | 0      | 0      | 0   | 7         | 0    | 0     | 0        | EGFR v.1     | 0    | 6       | 1         | 4     | 0      | 0        | 6       | 0      | 0      | 18  | 0         | 7    | 0     | 0        | 0  |    |   |
| 0          | 1    | 1       | 0         | 1     | 0      | 0        | 5       | 0      | 0      | 0   | 0         | 0    | 21    | 0        | SMO          | 1    | 4       | 1         | 1     | 5      | 0        | 0       | 21     | 0      | 0   | 0         | 0    | 29    | 0        | 0  | 8  |   |
| 0          | 3    | 1       | 1         | 0     | 11     | 0        | 0       | 0      | 0      | 0   | 0         | 0    | 0     | 0        | RET v.4      | 0    | 0       | 1         | 1     | 0      | 14       | 0       | 0      | 0      | 0   | 0         | 0    | 0     | 0        | 0  | 0  |   |
| 0          | 0    | 0       | 2         | 0     | 0      | 6        | 21      | 0      | 6      | 0   | 0         | 0    | 0     | 0        | CSF1R        | 1    | 0       | 1         | 5     | 0      | 0        | 6       | 26     | 0      | 24  | 0         | 0    | 0     | 0        | 0  | 8  |   |
| 1          | 2    | 1       | 1         | 0     | 0      | 0        | 0       | 0      | 0      | 0   | 0         | 0    | 0     | 0        | TSHR         | 1    | 2       | 1         | 1     | 3      | 1        | 0       | 0      | 5      | 0   | 0         | 0    | 0     | 0        | 0  | 0  |   |
| 0          | 0    | 0       | 2         | 0     | 0      | 0        | 0       | 0      | 0      | 0   | 0         | 0    | 50    | 0        | AR           | 0    | 1       | 2         | 2     | 0      | 2        | 3       | 0      | 0      | 0   | 0         | 0    | 0     | 21       | 0  | 0  |   |
| 0          | 0    | 0       | 0         | 0     | 0      | 0        | 0       | 0      | 0      | 0   | 0         | 0    | 0     | 0        | IDH1         | 3    | 1       | 2         | 3     | 0      | 0        | 0       | 16     | 5      | 0   | 0         | 0    | 0     | 0        | 0  | 0  |   |
| 0          | 1    | 0       | 0         | 0     | 1      | 0        | 0       | 0      | 0      | 0   | 0         | 0    | 21    | 0        | BCL2 v.α     | 0    | 3       | 1         | 0     | 1      | 0        | 0       | 0      | 0      | 12  | 0         | 0    | 21    | 0        | 0  | 8  |   |
| 0          | 0    | 0       | 0         | 0     | 0      | 0        | 5       | 0      | 0      | 0   | 0         | 0    | 0     | 0        | DNMT1        | 1    | 0       | 1         | 3     | 3      | 1        | 0       | 37     | 5      | 0   | 0         | 0    | 0     | 0        | 0  | 8  |   |
| 0          | 0    | 1       | 0         | 0     | 0      | 0        | 0       | 0      | 0      | 0   | 0         | 0    | 0     | 0        | DNMT3A v.1-3 | 0    | 3       | 1         | 1     | 2      | 2        | 3       | 5      | 5      | 0   | 0         | 0    | 0     | 0        | 0  | 0  |   |
| 0          | 0    | 0       | 0         | 0     | 1      | 0        | 0       | 0      | 0      | 0   | 0         | 0    | 0     | 0        | BCL2 v.α/β   | 0    | 3       | 0         | 2     | 0      | 0        | 0       | 0      | 0      | 12  | 0         | 0    | 0     | 29       | 0  | 0  |   |
| 0          | 0    | 1       | 0         | 0     | 0      | 0        | 0       | 0      | 0      | 0   | 0         | 0    | 0     | 0        | GATA2        | 1    | 0       | 2         | 2     | 4      | 0        | 0       | 0      | 0      | 0   | 0         | 0    | 0     | 0        | 0  | 0  |   |
| 0          | 0    | 1       | 1         | 1     | 0      | 3        | 0       | 0      | 0      | 0   | 0         | 0    | 0     | 0        | MPL          | 0    | 0       | 0         | 1     | 3      | 0        | 6       | 0      | 0      | 6   | 0         | 0    | 7     | 7        | 0  |    |   |
| 0          | 0    | 0       | 2         | 0     | 0      | 0        | 5       | 0      | 0      | 0   | 0         | 0    | 0     | 0        | NFE2L2       | 2    | 1       | 0         | 0     | 0      | 1        | 0       | 0      | 0      | 0   | 0         | 0    | 0     | 0        | 0  | 0  |   |
| 0          | 0    | 0       | 0         | 0     | 0      | 0        | 0       | 0      | 0      | 0   | 0         | 0    | 0     | 0        | HRAS         | 0    | 2       | 1         | 5     | 1      | 0        | 0       | 0      | 0      | 6   | 0         | 0    | 0     | 0        | 0  | 0  |   |
| 0          | 0    | 0       | 0         | 1     | 0      | 0        | 0       | 0      | 0      | 0   | 0         | 0    | 0     | 0        | KLF4         | 1    | 0       | 0         | 0     | 2      | 1        | 3       | 5      | 0      | 6   | 0         | 0    | 0     | 0        | 0  | 0  |   |
| 0          | 0    | 0       | 0         | 0     | 0      | 3        | 0       | 0      | 0      | 0   | 0         | 29   | 0     | 0        | PDGFRA       | 0    | 0       | 1         | 0     | 1      | 0        | 6       | 11     | 0      | 0   | 0         | 0    | 0     | 14       | 0  | 0  |   |
| 0          | 0    | 0       | 1         | 0     | 0      | 0        | 5       | 0      | 0      | 0   | 0         | 0    | 0     | 0        | MYD88        | 0    | 0       | 0         | 2     | 0      | 0        | 0       | 26     | 0      | 0   | 0         | 0    | 0     | 0        | 0  | 0  |   |
| 0          | 0    | 1       | 1         | 0     | 0      | 0        | 0       | 0      | 0      | 6   | 0         | 0    | 0     | 0        | JAK2         | 0    | 0       | 1         | 2     | 0      | 0        | 3       | 0      | 0      | 0   | 0         | 0    | 0     | 0        | 0  | 0  |   |
| 0          | 0    | 0       | 0         | 0     | 0      | 0        | 0       | 0      | 0      | 0   | 0         | 0    | 0     | 0        | NRAS         | 0    | 0       | 1         | 5     | 0      | 0        | 0       | 0      | 0      | 0   | 0         | 0    | 0     | 0        | 0  | 0  |   |
| 0          | 0    | 1       | 0         | 0     | 1      | 0        | 0       | 0      | 0      | 0   | 0         | 0    | 0     | 0        | KRAS         | 0    | 0       | 0         | 0     | 0      | 0        | 0       | 0      | 0      | 0   | 0         | 0    | 0     | 0        | 0  | 0  |   |
| 0          | 0    | 0       | 0         | 0     | 0      | 0        | 0       | 0      | 0      | 0   | 0         | 0    | 0     | 0        | SETBP1 v.1   | 0    | 0       | 0         | 0     | 0      | 0        | 3       | 0      | 0      | 0   | 0         | 0    | 21    | 0        | 0  | 0  |   |
| 0          | 0    | 0       | 0         | 0     | 0      | 0        | 0       | 0      | 0      | 0   | 0         | 0    | 0     | 0        | ABL1         | 0    | 0       | 0         | 0     | 0      | 0        | 0       | 11     | 0      | 0   | 0         | 0    | 0     | 0        | 0  | 0  |   |
| 0          | 0    | 0       | 0         | 0     | 0      | 0        | 0       | 0      | 0      | 0   | 0         | 0    | 0     | 0        | CBL          | 0    | 0       | 0         | 1     | 0      | 0        | 3       | 0      | 0      | 0   | 0         | 0    | 0     | 0        | 0  | 0  |   |
| 0          | 0    | 0       | 0         | 0     | 0      | 0        | 0       | 0      | 0      | 0   | 0         | 0    | 0     | 0        | CRLF2        | 0    | 0       | 0         | 0     | 0      | 0        | 0       | 0      | 0      | 0   | 0         | 0    | 0     | 0        | 0  | 0  |   |
| 0          | 0    | 0       | 0         | 0     | 0      | 0        | 0       | 0      | 0      | 0   | 0         | 0    | 0     | 0        | CTNNB1       | 0    | 0       | 1         | 0     | 0      | 0        | 0       | 0      | 0      | 0   | 0         | 0    | 0     | 0        | 0  | 0  |   |
| 0          | 0    | 0       | 0         | 0     | 0      | 0        | 0       | 0      | 0      | 0   | 0         | 0    | 0     | 0        | GNAQ         | 0    | 0       | 0         | 1     | 0      | 0        | 0       | 0      | 0      | 0   | 0         | 0    | 0     | 0        | 0  | 0  |   |
| 0          | 0    | 0       | 0         | 0     | 0      | 0        | 0       | 0      | 0      | 0   | 0         | 0    | 0     | 0        | PIK3CA       | 0    | 0       | 0         | 0     | 0      | 0        | 0       | 0      | 0      | 0   | 0         | 0    | 0     | 0        | 0  | 0  |   |
| 0          | 0    | 0       | 0         | 0     | 0      | 0        | 0       | 0      | 0      | 0   | 0         | 0    | 0     | 0        | SETBP1 v.2   | 0    | 0       | 0         | 0     | 1      | 0        | 0       | 0      | 0      | 0   | 0         | 0    | 0     | 0        | 7  | 0  | 0 |
| 0          | 0    | 0       | 0         | 0     | 0      | 0        | 0       | 0      | 0      | 0   | 0         | 0    | 0     | 0        | DNMT3A v.4   | 0    | 0       | 1         | 0     | 0      | 0        | 0       | 0      | 0      | 0   | 0         | 0    | 0     | 0        | 0  | 0  | 0 |
| 0          | 0    | 0       | 0         | 0     | 0      | 0        | 0       | 0      | 0      | 0   | 0         | 0    | 0     | 0        | GNAS         | 0    | 0       | 0         | 0     | 0      | 0        | 0       | 0      | 0      | 0   | 0         | 0    | 0     | 0        | 0  | 0  | 0 |
| 0          | 0    | 0       | 0         | 0     | 0      | 0        | 0       | 0      | 0      | 0   | 0         | 0    | 0     | 0        | SPOP         | 0    | 0       | 0         | 1     | 0      | 0        | 0       | 0      | 0      | 0   | 0         | 0    | 0     | 0        | 0  | 0  | 0 |

**Figure S2. Frequency of elevated expression of oncogenes in individual tumor types.** Frequency of strong (fold change  $\geq 10$ ) and moderate ( $5 \leq$  fold change  $< 10$ ) overexpression is indicated on the left and right, respectively, as a heat map (ranging 0%–100%). The frequencies of amplification-, and mutation-based, oncogenes are shown in the upper and lower panels, respectively.

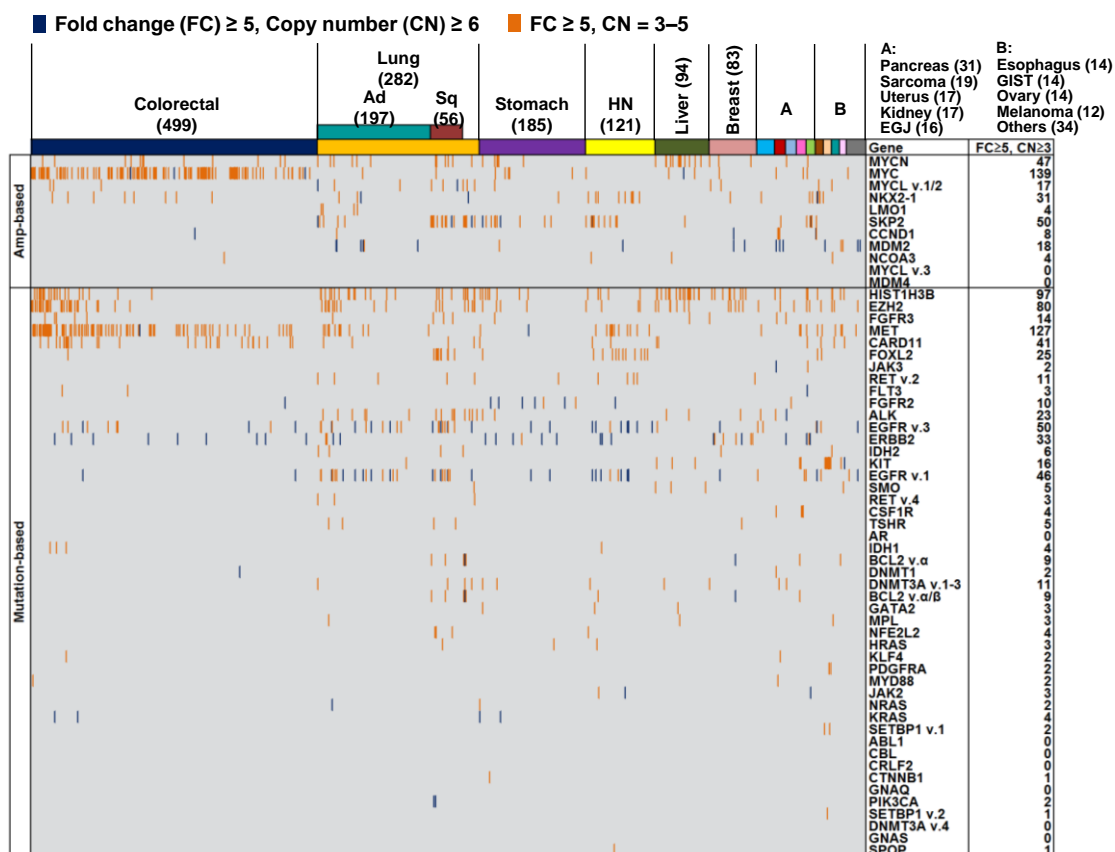

**Figure S3. Elevated gene expression with copy number gain of 64 oncogenes in 1,454 solid tumors.** Genes overexpressed  $\geq 5$ -fold with high (copy number  $\geq 6$ ) and moderate (copy number 3–5) genomic amplification are indicated by dark blue and orange bars, respectively. Genes are divided into two groups; amplification- and mutation-based oncogenes, in the upper and lower panels, respectively. The numbers on the right indicate the total number of samples with each gene overexpressed  $\geq 5$ -fold and genomic copy number  $\geq 3$ . As indicated at the top, samples are arranged by tumor type, including tumors from colorectal, lung, stomach, head and neck (HN), liver, breast, pancreas, sarcoma, uterus, kidney, esophagogastric junction (EGJ), esophagus, gastrointestinal stromal tumor (GIST), ovary, melanoma, and other types of tumors. The number of samples of each type of tumor is indicated in parentheses.

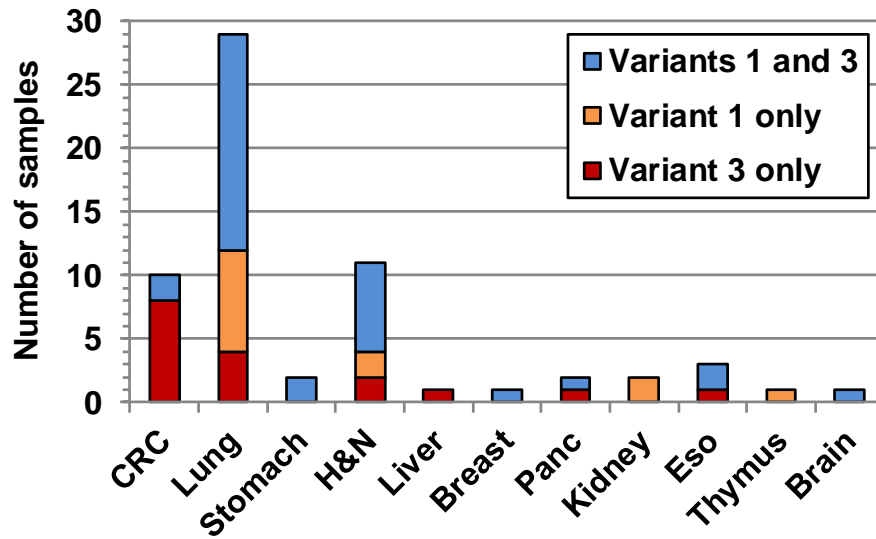

**Figure S4. Number of samples exhibiting overexpression and amplification of EGFR variants 1 and 3 in individual cancer types.** The total number of samples exhibiting EGFR overexpression ( $\geq 5$ -fold) and amplification (copy number  $\geq 3$ ) was 46 and 50 for variants 1 and 3, respectively. Among these, there were 33 samples in which both variants were overexpressed and amplified, and 11 and 17 samples in which only variant 1 or 3 was overexpressed and amplified, respectively. As indicated at the bottom, samples are arranged by tumor type, including tumors from colorectal (CRC), lung, stomach, head and neck (H&N), liver, breast, pancreas (Panc), kidney, esophagus (Eso), thymus, and brain.

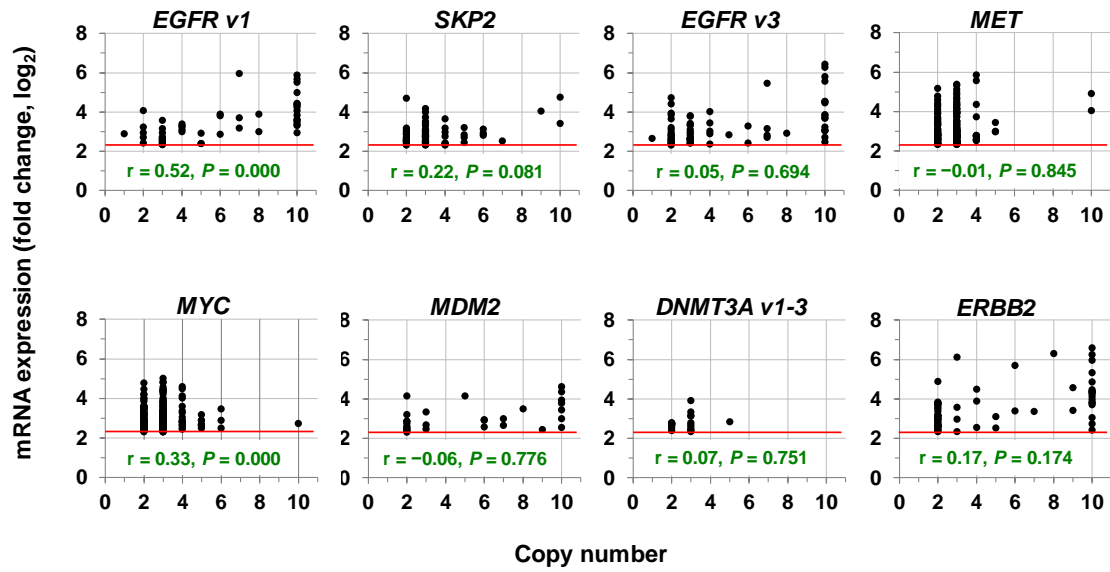

**Figure S5. Copy number and gene expression of eight oncogenes exhibiting high frequency of overexpression with amplification.** Genes amplified and overexpressed with frequency  $\geq 50\%$  include *EGFR* variant 1 (88%), *SKP2* (76%), *EGFR* variant 3 (70%), *MET* (65%), *MYC* (64%), *MDM2* (62%), *DNMT3A* variant 1-3 (52%), and *ERBB2* (50%) as listed in Table 1. Pearson's correlation coefficient ( $r$  with  $P$ -value) between copy number and mRNA expression is indicated at the bottom. Red horizontal bars indicate 5-fold on the log<sub>2</sub> scale.



| Colorectal (499) |                      |     |     |
|------------------|----------------------|-----|-----|
| Onc              | Exp / Amp (234)      | 234 |     |
| Onc / TSG        | SNV / INDEL (459)    | 214 | 245 |
| TSG              | Del (Homozygous) (0) |     |     |
| Fusion (9)       |                      |     |     |
| Unknown (20)     |                      |     | 20  |

  

| Lung_ad (197) |                      |    |    |
|---------------|----------------------|----|----|
| Onc           | Exp / Amp (66)       | 66 |    |
| Onc / TSG     | SNV / INDEL (112)    | 44 | 68 |
| TSG           | Del (Homozygous) (1) |    |    |
| Fusion (6)    |                      |    |    |
| Unknown (60)  |                      |    | 60 |

| Lung_sq (56) |                      |    |    |
|--------------|----------------------|----|----|
| Onc          | Exp / Amp (34)       | 34 |    |
| Onc / TSG    | SNV / INDEL (39)     | 26 | 13 |
| TSG          | Del (Homozygous) (0) |    |    |
| Fusion (1)   |                      |    |    |
| Unknown (9)  |                      |    | 9  |

  

| Stomach (185) |                      |    |    |
|---------------|----------------------|----|----|
| Onc           | Exp Amp (43)         | 43 |    |
| Onc / TSG     | SNV / INDEL (103)    | 33 | 70 |
| TSG           | Del (Homozygous) (0) |    |    |
| Fusion (0)    |                      |    |    |
| Unknown (72)  |                      |    | 72 |

| Breast (83)  |                      |    |    |
|--------------|----------------------|----|----|
| Onc          | Exp / Amp (29)       | 29 |    |
| Onc / TSG    | SNV / INDEL (40)     | 13 | 27 |
| TSG          | Del (Homozygous) (0) |    |    |
| Fusion (0)   |                      |    |    |
| Unknown (27) |                      |    | 27 |

  

| Head and neck (121) |                      |    |    |
|---------------------|----------------------|----|----|
| Onc                 | Exp / Amp (54)       | 54 |    |
| Onc / TSG           | SNV / INDEL (71)     | 35 | 36 |
| TSG                 | Del (Homozygous) (1) |    |    |
| Fusion (3)          |                      |    |    |
| Unknown (29)        |                      |    | 29 |

| Liver (94)   |                      |    |    |
|--------------|----------------------|----|----|
| Onc          | Exp / Amp (37)       | 37 |    |
| Onc / TSG    | SNV / INDEL (36)     | 17 | 19 |
| TSG          | Del (Homozygous) (3) |    |    |
| Fusion (1)   |                      |    |    |
| Unknown (36) |                      |    | 36 |

  

| Others (219) |                      |    |    |
|--------------|----------------------|----|----|
| Onc          | Exp / Amp (90)       | 90 |    |
| Onc / TSG    | SNV / INDEL (104)    | 52 | 52 |
| TSG          | Del (Homozygous) (1) |    |    |
| Fusion (4)   |                      |    |    |
| Unknown (74) |                      |    | 74 |

**Figure S6. Driver mutations, fusions, and genomic amplification in 1,454 solid tumors.**

Somatic structural alterations in individual tumor types are categorized into five types, as follows: overexpression with gene amplification in the 64 oncogenes (Onc, Exp/Amp); mutations, insertions, and deletions in the 138 driver genes (Onc/TSG, SNV/INDEL); homozygous deletions in the 74 tumor suppressor genes (TSG, Del); fusions of the 491 genes; and no alterations (Unknown). The driver effects of the 74 TSGs were assigned with the assumption of haploinsufficiency exertion of dominant-negative effects.



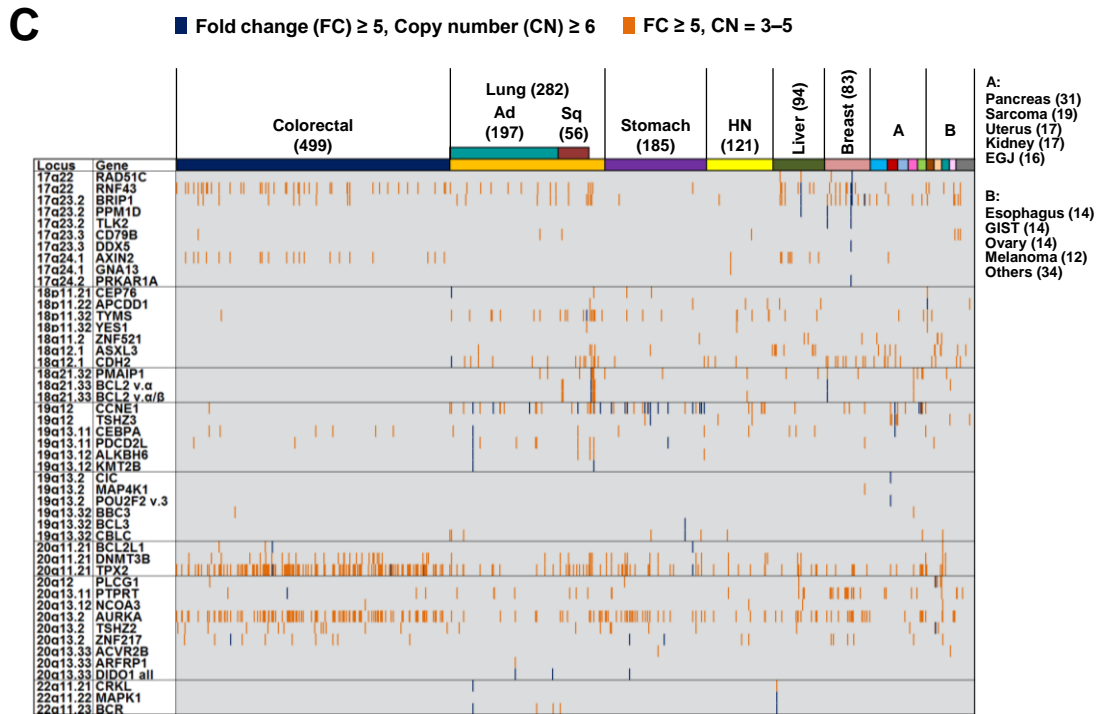

**Figure S7. Overexpressed and amplified chromosomal loci containing multiple cancer-related genes in 1,454 solid tumors.** Genes with overexpression and amplification are clustered by chromosomal locus, as indicated on the left. Genes overexpressed  $\geq 5$ -fold with high (copy number  $\geq 6$ ) and moderate (copy number 3–5) genomic amplification are indicated by dark blue and orange bars, respectively. As indicated at the top, samples are arranged by tumor type, including tumors from colorectal, lung, stomach, head and neck (HN), liver, breast, pancreas, sarcoma, uterus, kidney, esophagogastric junction (EGJ), esophagus, gastrointestinal stromal tumor (GIST), ovary, melanoma, and other types of tumors. The number of samples of each type of tumor is indicated in parentheses.
